# Supplementary material
Source: PubMed Central journal article supplement (PMC9764483)
Supplement: 13229_2022_524_MOESM1_ESM.pdf [file 13229_2022_524_MOESM1_ESM.pdf]

Supplementary Materials for

**Brainstem White Matter Microstructure is Associated with Hyporesponsiveness and Overall Sensory Features in Autistic Children**

Authors: Olivia Surgent<sup>1,2</sup>, Ali Riaz<sup>1</sup>, Karla K. Ausderau<sup>1,3</sup>, Nagesh Adluru<sup>1,4</sup>, Gregory R. Kirk<sup>1</sup>, Jose Guerrero-Gonzalez<sup>1,5</sup>, Emily C. Skaletski<sup>1,3</sup>, Steven R. Keckskemeti<sup>1</sup>, Douglas C Dean III<sup>1,5,6</sup>, Susan Ellis Weismer<sup>1,7,8,9</sup>, Andrew L. Alexander<sup>1,5,10</sup>, Brittany G. Travers<sup>1,3</sup>

Author Affiliations: <sup>1</sup>Waisman Center, University of Wisconsin-Madison, Madison, WI, USA, <sup>2</sup>Neuroscience Training Program, University of Wisconsin-Madison, Madison, WI, USA, <sup>3</sup>Occupational Therapy Program in the Department of Kinesiology, University of Wisconsin-Madison, Madison, WI, USA, <sup>4</sup>Department of Radiology, University of Wisconsin-Madison, Madison, WI, USA, <sup>5</sup>Department of Medical Physics, University of Wisconsin-Madison, Madison, WI, USA, <sup>6</sup>Department of Pediatrics, University of Wisconsin-Madison, Madison, WI, USA, <sup>7</sup>Department of Communication Sciences and Disorders, University of Wisconsin-Madison, Madison, WI, USA, <sup>8</sup>Department of Psychology, University of Wisconsin-Madison, Madison, WI, USA, <sup>9</sup>Department of Educational Psychology, University of Wisconsin-Madison, Madison, WI, USA, <sup>10</sup>Department of Psychiatry, University of Wisconsin-Madison, Madison, WI, USA

Author Email Addresses: Olivia Surgent: [osurgent@wisc.edu](mailto:osurgent@wisc.edu), Ali Riaz: [aariaz@wisc.edu](mailto:aariaz@wisc.edu), Karla Ausderau: [kausderau@wisc.edu](mailto:kausderau@wisc.edu), Nagesh Adluru: [adluru@wisc.edu](mailto:adluru@wisc.edu), Gregory Kirk: [gkirk@wisc.edu](mailto:gkirk@wisc.edu), Jose Guerrero-Gonzalez: [jguerreron@wisc.edu](mailto:jguerreron@wisc.edu), Emily C Skaletski: [eskaletski@wisc.edu](mailto:eskaletski@wisc.edu), Steven R. Keckskemeti: [keckskemeti@wisc.edu](mailto:keckskemeti@wisc.edu), Doug Dean III: [deaniii@wisc.edu](mailto:deaniii@wisc.edu), Susan Ellis Weismer: [susan.ellisweismer@wisc.edu](mailto:susan.ellisweismer@wisc.edu), Andrew Alexander: [andy.alexander@wisc.edu](mailto:andy.alexander@wisc.edu), Brittany G Travers: [btravers@wisc.edu](mailto:btravers@wisc.edu)

**Corresponding author's contact information:**

Brittany G. Travers  
Waisman Center  
University of Wisconsin-Madison  
1500 Highland Avenue, Room 435  
Madison, WI 53705  
Phone: (608) 263-0282  
Fax: (608) 263-0529  
Email: [btravers@wisc.edu](mailto:btravers@wisc.edu)

**Additional Methods: Power analysis.** The effects that require the most statistical power in this study are the voxel-based analysis interaction effects. A conservative *a priori* power estimated that 71 participants in each group would provide 90% power to detect interaction effects of interest in our voxel-based analysis. However, this was a very conservative estimate (based on the challenges of calculating power for an analysis like this that additionally uses an *fdr* correction). Due to the impact of the COVID-19 pandemic on our ability to run participants in-person, our final sample size of complete data was 63 autistic participants and 74 non-autistic participants. Rigorous quality control checks additionally flagged 2 DWI scans in the non-autistic group and 1 DWI scan in the autistic group to not include. Additionally, we found 1 SEQ score in the autistic group to have outlying values that affected that analysis, and they were therefore omitted. This left a final sample size of 61 autistic participants and 72 non-autistic participants.

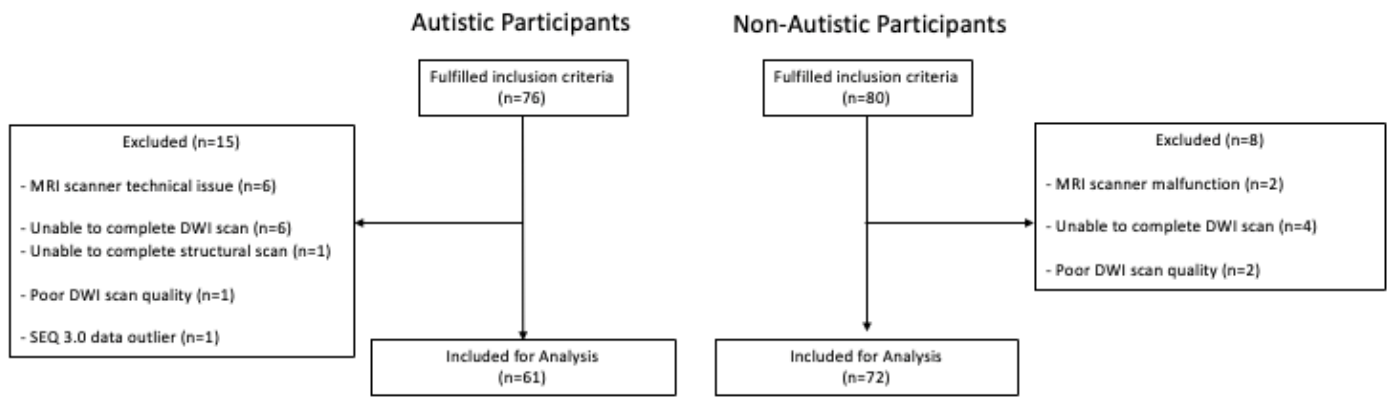

Supplementary Figure 1. Study enrollment flow chart. Information about potential participants who were screened for inclusion but did not meet inclusion criteria was not recorded and therefore is not included. The scanner malfunction was due to an upgrade that changed the scan parameters during a time in which 8 participants were scanned. Rigorous quality control checks of the diffusion weighted imaging (DWI) data determined poorer data quality in 3 participants. Therefore, these 3 participants were excluded from analyses. Examination of the caregiver reported Sensory Experience Questionnaire 3.0 (SEQ 3.0) data identified 1 extreme outlier within the autistic group (Cook's distances  $>4/n$ ). This participant was therefore excluded from the analyses.

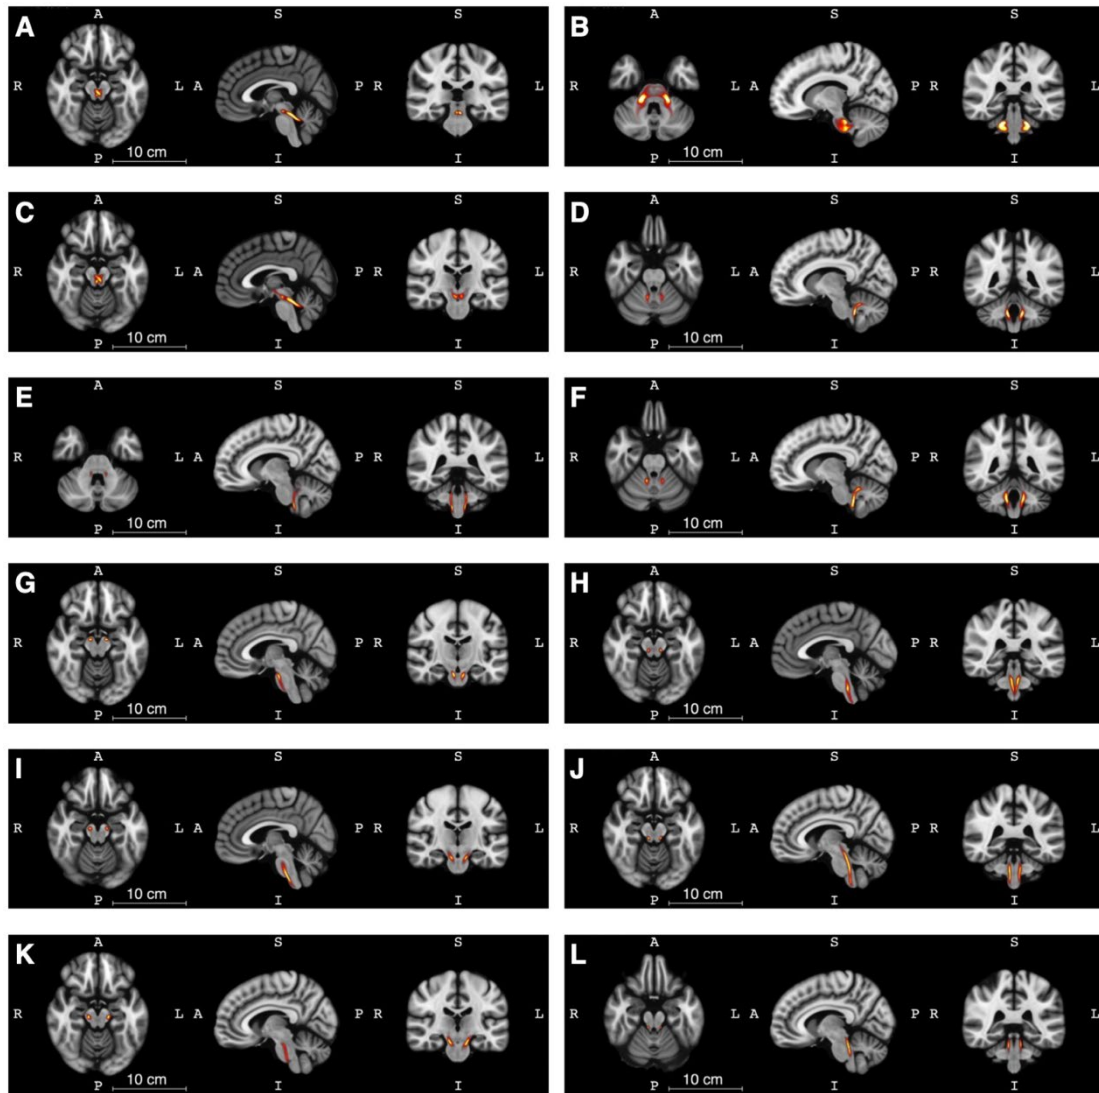

Supplementary Figure 2. Bilateral brainstem white matter bundles from the probabilistic brainstem connectome atlas<sup>19</sup> visualized with MNI 152 T1 underlay. (A) Superior cerebellar peduncle cerebellorubral tract (SCPCR), (B) middle cerebellar peduncle (MCP), (C) superior cerebellar peduncle cerebellothalamic tract (SCPCT), (D) superior cerebellar peduncle spinocerebellar tract (SCPSC), (E) inferior cerebellar peduncle vestibulocerebellar tract (ICPVC), (F) inferior cerebellar peduncle medulla-cerebellar tract (ICPMC), (G) fronto-pontine tract (FPT), (H) medial lemniscus (ML), (I) corticospinal tract (CST), (J) spinothalamic tract (STT), (K) parieto-occipito-temporo-pontine tract (POTPT), (L) lateral lemniscus (LL).

**Supplementary Table 1. Autistic vs non-autistic group differences in brainstem FWE-DTI metrics**

| Brainstem<br>White Matter<br>Region | FWE-FA |           |       |     | FWE-MD |           |       |     |
|-------------------------------------|--------|-----------|-------|-----|--------|-----------|-------|-----|
|                                     | b      | Std Error | t     | p   | b      | Std Error | t     | p   |
| CST                                 | 0.005  | 0.007     | 0.72  | .47 | -0.001 | 0.003     | -0.28 | .78 |
| ML                                  | 0.003  | 0.005     | 0.58  | .56 | -0.005 | 0.002     | -1.89 | .06 |
| LL                                  | 0.010  | 0.008     | 1.26  | .21 | -0.005 | 0.003     | -1.56 | .12 |
| FPT                                 | 0.012  | 0.008     | 1.54  | .13 | -0.001 | 0.004     | -0.23 | .82 |
| POTPT                               | 0.005  | 0.006     | 0.85  | .40 | 0.000  | 0.003     | -0.15 | .88 |
| STT                                 | 0.006  | 0.005     | 1.20  | .23 | -0.004 | 0.002     | -1.76 | .08 |
| SCPCT                               | -0.001 | 0.004     | -0.15 | .88 | -0.002 | 0.002     | -0.66 | .51 |
| SCPSC                               | 0.011  | 0.006     | 1.74  | .08 | -0.006 | 0.003     | -1.58 | .12 |
| ICPMC                               | 0.011  | 0.006     | 2.01  | .05 | 0.001  | 0.003     | 0.23  | .82 |
| ICPVC                               | 0.012  | 0.006     | 1.93  | .06 | 0.001  | 0.003     | 0.27  | .79 |
| MCP                                 | 0.006  | 0.005     | 1.13  | .26 | -0.002 | 0.003     | -0.68 | .50 |

Group difference effects controlling for age, sex and average head motion during DWI brain scan

ML medial lemniscus; LL lateral lemniscus; STT spinothalamic tract; SCPCT superior cerebellar peduncle cerebellothalamic tract; SCPSC superior cerebellar peduncle spinocerebellar tract; MCP middle cerebellar peduncle; ICPMC inferior cerebellar peduncle tracts from medulla oblongata to the cerebellum; ICPVCT inferior cerebellar peduncle vestibulocerebellar tract; FPT frontopontine tract; POTPT parieto-occipito-temporo-pontine tract; CST corticospinal tract

a Uncorrected  $p < .05$

b False discovery rate (FDR) corrected  $p < .05$

**Supplementary Table 2. Effects of total sensory features on brainstem traditional DTI in autistic and non-autistic children**

| Brainstem<br>White Matter<br>Region | FWE-FA                    |              |       |                   |                                                                  |              |       |                   | FWE-MD                    |           |      |                   |                                                                  |              |      |                   |
|-------------------------------------|---------------------------|--------------|-------|-------------------|------------------------------------------------------------------|--------------|-------|-------------------|---------------------------|-----------|------|-------------------|------------------------------------------------------------------|--------------|------|-------------------|
|                                     | Laterality<br>Main Effect |              |       |                   | Laterality x Total Sensory Feature x<br>Group Interaction Effect |              |       |                   | Laterality<br>Main Effect |           |      |                   | Laterality x Total Sensory Feature x Group<br>Interaction Effect |              |      |                   |
|                                     | b                         | Std<br>Error | t     | p                 | b                                                                | Std<br>Error | t     | p                 | b                         | Std Error | t    | p                 | b                                                                | Std<br>Error | t    | p                 |
| CST                                 | -0.005                    | 0.023        | -0.22 | 0.83              | -0.009                                                           | 0.019        | -0.50 | 0.62              | -0.00691                  | 0.01213   | -0.6 | 0.57              | -0.00817                                                         | 0.01011      | -0.8 | 0.42              |
| ML                                  | -0.029                    | 0.013        | -2.20 | 0.03 <sup>a</sup> | -0.026                                                           | 0.011        | -2.43 | 0.02 <sup>a</sup> | -0.02520                  | 0.00788   | -3.2 | 0.01 <sup>a</sup> | -0.00821                                                         | 0.00657      | -1.2 | 0.23              |
| LL                                  | 0.008                     | 0.033        | 0.26  | 0.80              | 0.013                                                            | 0.027        | 0.49  | 0.63              | 0.03650                   | 0.01848   | 2.0  | 0.05              | 0.00276                                                          | 0.01539      | 0.2  | 0.86              |
| FPT                                 | 0.037                     | 0.030        | 1.25  | 0.21              | 0.027                                                            | 0.025        | 1.08  | 0.28              | -0.01475                  | 0.01436   | -1.0 | 0.30              | -0.01104                                                         | 0.01196      | -0.9 | 0.36              |
| POTPT                               | -0.049                    | 0.025        | -1.97 | 0.05              | 0.005                                                            | 0.021        | 0.26  | 0.80              | -0.00266                  | 0.00859   | -0.3 | 0.76              | -0.00480                                                         | 0.00715      | -0.7 | 0.50              |
| STT                                 | -0.021                    | 0.018        | -1.13 | 0.26              | -0.007                                                           | 0.015        | -0.45 | 0.66              | 0.00825                   | 0.01162   | 0.7  | 0.48              | -0.00859                                                         | 0.00968      | -0.9 | 0.37              |
| SCPCT                               | -0.017                    | 0.010        | -1.72 | 0.09              | 0.001                                                            | 0.008        | 0.15  | 0.88              | 0.00704                   | 0.00595   | 1.2  | 0.25              | 0.01242                                                          | 0.00496      | 2.5  | 0.02 <sup>a</sup> |
| SCPSC                               | 0.004                     | 0.025        | 0.14  | 0.89              | 0.019                                                            | 0.021        | 0.90  | 0.37              | 0.01058                   | 0.01455   | 0.7  | 0.47              | 0.00093                                                          | 0.01212      | 0.1  | 0.94              |
| ICPMC                               | -0.003                    | 0.018        | -0.16 | 0.87              | 0.010                                                            | 0.015        | 0.64  | 0.52              | 0.02094                   | 0.01071   | 2.0  | 0.05              | 0.00843                                                          | 0.00892      | 0.9  | 0.35              |
| ICPVC                               | -0.014                    | 0.018        | -0.77 | 0.44              | -0.012                                                           | 0.015        | -0.78 | 0.44              | 0.00911                   | 0.01026   | 0.9  | 0.37              | 0.01076                                                          | 0.00855      | 1.3  | 0.21              |

Main and interaction effects controlling for age, sex and average head motion during DWI brain scan

ML medial lemniscus; LL lateral lemniscus; STT spinothalamic tract; SCPCT superior cerebellar peduncle cerebellothalamic tract; SCPSC superior cerebellar peduncle spinocerebellar tract; ICPMC inferior cerebellar peduncle tracts from medulla oblongata to the cerebellum; ICPVCT inferior cerebellar peduncle vestibulocerebellar tract; FPT frontopontine tract; POTPT parieto-occipito-temporo-pontine tract; CST corticospinal tract

a Uncorrected p<.05

b False discovery rate (FDR) corrected p<.05

**Supplementary Table 3. Effects of total sensory features on brainstem traditional DTI in autistic and non-autistic children**

| Brainstem<br>White Matter<br>Region | FWE-FA                                |              |       |     |                                                      |              |      |      | FWE-MD                                |              |       |                  |                                                      |              |       |                  |
|-------------------------------------|---------------------------------------|--------------|-------|-----|------------------------------------------------------|--------------|------|------|---------------------------------------|--------------|-------|------------------|------------------------------------------------------|--------------|-------|------------------|
|                                     | Total Sensory Features<br>Main Effect |              |       |     | Group x Total Sensory Features<br>Interaction Effect |              |      |      | Total Sensory Features<br>Main Effect |              |       |                  | Group x Total Sensory Features<br>Interaction Effect |              |       |                  |
|                                     | b                                     | Std<br>Error | t     | p   | b                                                    | Std<br>Error | t    | p    | b                                     | Std<br>Error | t     | p                | b                                                    | Std<br>Error | t     | p                |
| CST                                 | -0.002                                | 0.010        | -0.20 | .84 | 0.007                                                | 0.020        | 0.35 | .72  | 0.007                                 | 0.006        | 1.25  | .21              | -0.013                                               | 0.011        | -1.12 | .26              |
| ML                                  | -0.006                                | 0.008        | -0.81 | .42 | 0.027                                                | 0.016        | 1.71 | .09  | 0.000                                 | 0.004        | -0.06 | .95              | -0.001                                               | 0.009        | -0.16 | .87              |
| LL                                  | 0.009                                 | 0.012        | 0.80  | .43 | 0.011                                                | 0.024        | 0.44 | .66  | -0.012                                | 0.011        | -1.11 | .27              | 0.025                                                | 0.023        | 1.12  | .27              |
| FPT                                 | -0.023                                | 0.012        | -2.01 | .05 | 0.035                                                | 0.024        | 1.44 | .15  | 0.018                                 | 0.007        | 2.38  | .02 <sup>a</sup> | -0.039                                               | 0.015        | -2.54 | .01 <sup>a</sup> |
| POTPT                               | -0.010                                | 0.008        | -1.27 | .21 | 0.006                                                | 0.017        | 0.36 | .72  | 0.002                                 | 0.005        | 0.42  | .67              | -0.010                                               | 0.010        | -1.00 | .32              |
| STT                                 | 0.007                                 | 0.007        | 0.91  | .37 | 0.000                                                | 0.015        | 0.00 | 1.00 | -0.001                                | 0.005        | -0.11 | .91              | 0.002                                                | 0.009        | 0.23  | .82              |
| SCPCT                               | 0.001                                 | 0.005        | 0.23  | .82 | 0.004                                                | 0.011        | 0.37 | .71  | 0.000                                 | 0.004        | 0.08  | .94              | -0.008                                               | 0.008        | -1.01 | .32              |
| SCPSC                               | -0.008                                | 0.008        | -1.02 | .31 | 0.006                                                | 0.017        | 0.39 | .70  | -0.003                                | 0.009        | -0.30 | .76              | 0.011                                                | 0.018        | 0.60  | .55              |
| ICPMC                               | 0.002                                 | 0.008        | 0.29  | .77 | 0.011                                                | 0.017        | 0.66 | .51  | -0.001                                | 0.006        | -0.12 | .90              | -0.018                                               | 0.012        | -1.51 | .13              |
| ICPVC                               | 0.007                                 | 0.009        | 0.76  | .45 | 0.007                                                | 0.018        | 0.40 | .69  | 0.000                                 | 0.006        | 0.03  | .97              | -0.016                                               | 0.012        | -1.34 | .18              |
| MCP                                 | 0.009                                 | 0.008        | 1.19  | .23 | 0.016                                                | 0.016        | 1.02 | .31  | 0.004                                 | 0.004        | 0.89  | .38              | -0.016                                               | 0.009        | -1.76 | .08              |

Main and interaction effects controlling for age, sex and average head motion during DWI brain scan

ML medial lemniscus; LL lateral lemniscus; STT spinothalamic tract; SCPCT superior cerebellar peduncle cerebellothalamic tract; SCPSC superior cerebellar peduncle spinocerebellar tract; MCP middle cerebellar peduncle; ICPMC inferior cerebellar peduncle tracts from medulla oblongata to the cerebellum; ICPVCT inferior cerebellar peduncle vestibulocerebellar tract; FPT frontopontine tract; POTPT parieto-occipito-temporo-pontine tract; CST corticospinal tract

a Uncorrected p<.05

b False discovery rate (FDR) corrected p<.05

**Supplementary Table 4. FWE-MD clusters representing total sensory features-by-diagnostic group interaction effects**

| Region                                          | Right/Left | Cluster Size<br>(voxels) | X   | Y   | Z   | p-value |
|-------------------------------------------------|------------|--------------------------|-----|-----|-----|---------|
| Middle Occipital White Matter, Sagittal Stratum | Right      | 6548                     | 52  | 68  | 70  | <.001   |
| Pontine Crossing Tract, Brainstem White Matter  | Left       | 2600                     | 88  | 101 | 42  | <.001   |
| Inferior Occipital White Matter                 | Left       | 1424                     | 122 | 46  | 70  | <.001   |
| Putamen                                         | Right      | 1072                     | 66  | 124 | 87  | <.001   |
| Inferior Cerebellar Peduncle                    | Right      | 795                      | 78  | 82  | 35  | <.001   |
| Substantia Nigra                                | Left       | 620                      | 121 | 99  | 77  | <.001   |
| Precentral White Matter                         | Right      | 433                      | 64  | 107 | 140 | .004    |
| Supramarginal White Matter                      | Right      | 416                      | 57  | 92  | 90  | <.001   |
| Cingulum                                        | Right      | 390                      | 81  | 80  | 93  | <.001   |
| Posterior Thalamic Radiation                    | Left       | 367                      | 118 | 62  | 71  | <.001   |
| Thalamus                                        | Right      | 359                      | 70  | 102 | 69  | .002    |
| Superior Parietal Lobule                        | Right      | 318                      | 54  | 86  | 122 | <.001   |
| Postcentral White Matter                        | Right      | 272                      | 59  | 94  | 123 | .008    |
| Cuneus White Matter                             | Left       | 212                      | 104 | 32  | 83  | <.001   |
| Inferior Cerebellar Peduncle                    | Left       | 185                      | 103 | 83  | 40  | <.001   |
| Supramarginal White Matter                      | Right      | 162                      | 36  | 91  | 90  | <.001   |
| Angular White Matter                            | Right      | 116                      | 48  | 58  | 108 | .017    |
| Precentral White Matter                         | Right      | 115                      | 34  | 129 | 82  | <.001   |
| Postcentral White Matter                        | Left       | 90                       | 124 | 95  | 121 | .003    |
| Superior Parietal White Matter                  | Left       | 77                       | 118 | 81  | 126 | .041    |
| Postcentral White Matter                        | Right      | 55                       | 46  | 100 | 128 | .004    |
| Cingulum White Matter                           | Right      | 53                       | 78  | 71  | 99  | .036    |
| Middle Occipital Gyrus                          | Left       | 50                       | 103 | 40  | 62  | .014    |
| Middle Temporal White Matter                    | Right      | 44                       | 51  | 75  | 87  | .021    |
| Superior Parietal White Matter                  | Left       | 37                       | 106 | 59  | 106 | .030    |
| Cerebellar White Matter                         | Right      | 28                       | 74  | 62  | 39  | .023    |
| Sagittal Stratum                                | Left       | 22                       | 127 | 83  | 60  | .025    |
| Superior Temporal White Matter                  | Right      | 17                       | 48  | 99  | 71  | .016    |
| Middle Temporal White Matter                    | Right      | 17                       | 47  | 86  | 76  | .033    |
| Inferior Temporal White Matter                  | Right      | 17                       | 37  | 81  | 62  | .007    |
| Superior Temporal White Matter                  | Right      | 15                       | 48  | 91  | 71  | .026    |
| Postcentral White Matter                        | Left       | 14                       | 129 | 93  | 130 | .041    |
| Postcentral White Matter                        | Left       | 12                       | 127 | 101 | 115 | .044    |
| Middle Cerebellar Peduncle                      | Left       | 12                       | 103 | 102 | 43  | .006    |
| Superior Parietal White Matter                  | Left       | 11                       | 110 | 66  | 101 | .041    |
| Corticospinal Tract                             | Left       | 9                        | 95  | 99  | 34  | .034    |
| Postcentral White Matter                        | Left       | 9                        | 135 | 107 | 124 | .018    |
| Cingulum                                        | Right      | 5                        | 83  | 106 | 107 | .047    |
| Cerebellar White Matter                         | Right      | 4                        | 84  | 68  | 54  | .045    |
| Postcentral White Matter                        | Left       | 3                        | 128 | 94  | 128 | .047    |
| Superior Cerebellar peduncle                    | Right      | 3                        | 82  | 86  | 40  | .035    |
| Superior Parietal White Matter                  | Left       | 2                        | 99  | 57  | 124 | .044    |
| Cingulum White Matter                           | Left       | 2                        | 98  | 70  | 92  | .049    |
| Superior Temporal White Matter                  | Left       | 2                        | 137 | 101 | 71  | .044    |
| Cingulum                                        | Right      | 1                        | 82  | 86  | 42  | .045    |
| Corpus Callosum (Body)                          | Right      | 1                        | 80  | 108 | 100 | .048    |
| Angular White Matter                            | Right      | 1                        | 53  | 86  | 99  | .048    |
| Superior Corona Radiata                         | Right      | 1                        | 69  | 105 | 93  | .046    |
| Cingulum                                        | Right      | 1                        | 69  | 90  | 66  | .049    |
| Middle Occipital White Matter                   | Right      | 1                        | 69  | 37  | 75  | .048    |
| Midbrain                                        | Left       | 1                        | 97  | 101 | 60  | .033    |



**Supplementary Table 5. FWE-MD clusters representing main effects of total sensory features in autistic group**

| Region                                                           | Right/Left | Cluster Size<br>(voxels) | X   | Y   | Z   | p-value |
|------------------------------------------------------------------|------------|--------------------------|-----|-----|-----|---------|
| Superior Temporal White Matter, Superior Longitudinal Fasciculus | Right      | 21082                    | 54  | 65  | 66  | <.001   |
| Pontine Crossing Tract                                           | Left       | 4206                     | 93  | 90  | 32  | <.001   |
| External Capsule Superior Corona Radiata                         | Right      | 2069                     | 65  | 129 | 90  | <.001   |
| Superior Frontal White Matter                                    | Right      | 1491                     | 75  | 142 | 120 | <.001   |
| Posterior Thalamic Radiation                                     | Left       | 1173                     | 120 | 61  | 72  | <.001   |
| Supramarginal White Matter                                       | Left       | 954                      | 129 | 88  | 96  | <.001   |
| Middle Frontal White Matter                                      | Left       | 896                      | 117 | 142 | 110 | <.001   |
| Superior Parietal White Matter                                   | Right      | 630                      | 58  | 83  | 130 | <.001   |
| Posterior Limb of Internal Capsule                               | Right      | 533                      | 80  | 124 | 72  | <.001   |
| Cuneus White Matter                                              | Left       | 525                      | 109 | 34  | 88  | .001    |
| Superior Frontal White Matter                                    | Right      | 481                      | 70  | 123 | 124 | <.001   |
| External Capsule                                                 | Right      | 434                      | 60  | 138 | 77  | <.001   |
| Superior Frontal White Matter                                    | Right      | 419                      | 74  | 168 | 99  | .004    |
| Inferior Frontal White Matter                                    | Right      | 385                      | 54  | 157 | 81  | .023    |
| Precentral White Matter                                          | Left       | 345                      | 117 | 105 | 116 | .027    |
| Middle Frontal Orbital White Matter                              | Right      | 345                      | 71  | 146 | 57  | .001    |
| Inferior Frontal White Matter                                    | Right      | 310                      | 56  | 136 | 87  | .005    |
| Anterior Corona Radiata                                          | Left       | 301                      | 103 | 163 | 82  | <.001   |
| Superior Parietal White Matter                                   | Left       | 262                      | 116 | 82  | 124 | .015    |
| Anterior Corona Radiata                                          | Left       | 254                      | 106 | 152 | 98  | .011    |
| Cingulum (Cingulate Gyrus)                                       | Right      | 193                      | 82  | 106 | 104 | .014    |
| Precentral White Matter                                          | Right      | 171                      | 75  | 103 | 142 | .031    |
| Superior Temporal White Matter                                   | Left       | 166                      | 119 | 102 | 89  | .018    |
| Middle Frontal White Matter                                      | Left       | 143                      | 114 | 162 | 109 | <.001   |
| Middle Frontal White Matter                                      | Right      | 143                      | 58  | 137 | 126 | .006    |
| Middle Cerebellar peduncle                                       | Right      | 136                      | 65  | 70  | 29  | <.001   |
| Superior Frontal White Matter                                    | Left       | 123                      | 107 | 181 | 90  | .001    |
| Superior Frontal White Matter                                    | Left       | 113                      | 109 | 127 | 138 | <.001   |
| Cingulum                                                         | Right      | 112                      | 72  | 85  | 77  | .034    |
| Cingulum                                                         | Left       | 89                       | 102 | 79  | 79  | .038    |
| Posterior Corona Radiata                                         | Left       | 69                       | 112 | 103 | 97  | .036    |
| Globus Pallidus                                                  | Right      | 69                       | 74  | 128 | 66  | <.001   |
| Corpus Callosum (Body)                                           | Right      | 60                       | 77  | 139 | 101 | .037    |
| Cerebellar White Matter                                          | Left       | 60                       | 102 | 50  | 35  | .015    |
| Middle Frontal White Matter                                      | Right      | 57                       | 57  | 179 | 76  | .032    |
| Cerebellar White Matter                                          | Left       | 55                       | 106 | 63  | 38  | .014    |
| Cerebellar White Matter                                          | Right      | 55                       | 73  | 54  | 32  | <.001   |
| Lateral Fronto Orbital White Matter                              | Right      | 54                       | 64  | 153 | 60  | .014    |
| Middle Frontal White Matter                                      | Right      | 54                       | 56  | 145 | 119 | .036    |
| Middle Frontal White Matter                                      | Left       | 49                       | 122 | 158 | 94  | .037    |
| Superior Corona Radiata                                          | Left       | 41                       | 122 | 110 | 107 | .034    |
| Postcentral White Matter                                         | Right      | 38                       | 51  | 107 | 114 | .003    |
| Inferior Frontal White Matter                                    | Right      | 31                       | 47  | 165 | 67  | .033    |
| Caudate Nucleus                                                  | Left       | 31                       | 108 | 118 | 92  | .038    |
| Insular White Matter                                             | Right      | 28                       | 62  | 147 | 82  | .032    |
| Precentral White Matter                                          | Left       | 27                       | 106 | 99  | 123 | .038    |
| Inferior Frontal White Matter                                    | Right      | 27                       | 38  | 144 | 83  | .031    |
| Superior Corona Radiata                                          | Right      | 26                       | 61  | 124 | 110 | .029    |
| Fornix Stria Terminalis                                          | Right      | 26                       | 70  | 94  | 80  | .033    |
| Postcentral White Matter                                         | Right      | 26                       | 52  | 94  | 135 | .027    |
| Cerebellar White Matter                                          | Right      | 23                       | 64  | 59  | 29  | .001    |
| Middle Occipital White Matter                                    | Left       | 18                       | 120 | 50  | 77  | .045    |

|                                      |       |    |     |     |     |      |
|--------------------------------------|-------|----|-----|-----|-----|------|
| Cerebellar White Matter              | Right | 16 | 55  | 64  | 34  | .035 |
| Posterior Corona Radiata             | Left  | 15 | 117 | 79  | 97  | .036 |
| Middle Occipital Gyrus               | Right | 11 | 65  | 38  | 92  | .042 |
| Cingulum                             | Right | 10 | 83  | 148 | 96  | .035 |
| Superior Frontal White Matter        | Left  | 10 | 101 | 167 | 113 | .038 |
| Inferior Frontal White Matter        | Left  | 10 | 121 | 171 | 79  | .044 |
| Medulla                              | Right | 9  | 90  | 88  | 12  | .023 |
| Cerebellar White Matter              | Right | 8  | 75  | 76  | 29  | .001 |
| Precentral White Matter              | Left  | 6  | 145 | 131 | 79  | .031 |
| Middle Frontal White Matter          | Left  | 5  | 111 | 168 | 110 | .036 |
| Anterior corona radiata              | Right | 5  | 69  | 155 | 101 | .048 |
| Inferior Fronto Occipital Fasciculus | Left  | 4  | 110 | 142 | 56  | .033 |
| Insular White Matter                 | Left  | 4  | 114 | 145 | 54  | .044 |
| Middle Occipital White Matter        | Left  | 4  | 125 | 54  | 77  | .048 |
| Superior Temporal White Matter       | Right | 3  | 37  | 111 | 70  | .049 |
| Superior Frontal Gyrus               | Left  | 3  | 103 | 189 | 74  | .046 |
| Inferior Frontal White Matter        | Right | 3  | 52  | 158 | 65  | .049 |
| Superior Frontal White Matter        | Right | 2  | 79  | 157 | 125 | .047 |
| Cerebellar White Matter              | Right | 2  | 84  | 68  | 54  | .048 |
| Superior Frontal White Matter        | Right | 2  | 75  | 162 | 111 | .050 |
| Superior Frontal White Matter        | Right | 2  | 76  | 150 | 110 | .050 |
| Cerebellar White Matter              | Left  | 2  | 107 | 71  | 42  | .045 |
| Cerebellar White Matter              | Right | 2  | 59  | 61  | 35  | .041 |
| Supramarginal White Matter           | Right | 2  | 34  | 89  | 103 | .043 |
| Cerebellar White Matter              | Left  | 1  | 98  | 62  | 43  | .046 |
| Cingulum                             | Right | 1  | 82  | 146 | 97  | .044 |
| Superior Parietal White Matter       | Left  | 1  | 114 | 87  | 117 | .049 |
| Fornix                               | Left  | 1  | 119 | 112 | 62  | .046 |
| Superior Frontal White Matter        | Left  | 1  | 105 | 188 | 76  | .047 |
| Cerebellar White Matter              | Left  | 1  | 116 | 81  | 27  | .048 |
| Superior Corona Radiata              | Right | 1  | 67  | 128 | 99  | .049 |
| Superior Frontal White Matter        | Right | 1  | 80  | 157 | 123 | .048 |
| Thalamic White Matter                | Right | 1  | 66  | 105 | 73  | .049 |
| Inferior Frontal White Matter        | Right | 1  | 50  | 164 | 71  | .047 |
